# Supplementary material for: Monolithic porous magnesium silicide
Source: Royal Society of Chemistry journal article supplement (doi:10.1039/c7dt00571g), 2017-01-01
Supplement: c7dt00571g1.pdf [file c7dt00571g1.pdf]

# Electronic Supplementary Information (ESI) for Dalton Transactions

## Monolithic porous magnesium silicide

N. Hayati-Roodbari,<sup>a</sup> R. J.F. Berger,<sup>a</sup> J. Bernardi,<sup>b</sup> S. Kinge,<sup>c</sup> N. Hüsing<sup>a</sup> and M. S. Elsaesser<sup>\*a</sup>

<sup>a</sup> Materials Chemistry, Paris Lodron University Salzburg, Jakob-Haringer Straße 2A, 5020 Salzburg, Austria

<sup>b</sup> USTEM, Vienna University of Technology, 1040 Vienna, Austria

<sup>c</sup> Toyota Motors Company Europe, 2000 Antwerp, Belgium

**Table ESI 1: N<sub>2</sub> sorption and PXRD data of different Mg<sub>2</sub>Si samples at synthesis conditions as indicated with porous Si as precursor (samples with “Si44μ” labeled derive from commercial Si powder)**

|                                       | SA <sub>BET</sub><br>(m <sup>2</sup> g <sup>-1</sup> ) | Crystallite size of Mg <sub>2</sub> Si <sup>*</sup><br>(2 2 0)<br>[nm] | Crystallite size of Si <sup>*</sup><br>(1 1 1)<br>[nm] |
|---------------------------------------|--------------------------------------------------------|------------------------------------------------------------------------|--------------------------------------------------------|
| Magnesium silicide_650 °C_30min       | <50                                                    | 100                                                                    | ---                                                    |
| Magnesium silicide_650 °C_2 h         | <50                                                    | 116                                                                    | ---                                                    |
| Magnesium silicide_650 °C_5 h         | <50                                                    | 140                                                                    | ---                                                    |
| Magnesium silicide_600 °C_2 h         | <50                                                    | 128                                                                    | 25 <sup>**</sup>                                       |
| Magnesium silicide_600 °C_5 h         | <50                                                    | 130                                                                    | ---                                                    |
| Magnesium silicide_700 °C_30min       | <50                                                    | 101                                                                    | ---                                                    |
| Magnesium silicide_700 °C_2 h         | <50                                                    | 151                                                                    | ---                                                    |
| Magnesium silicide_Si44μ_650 °C_30min | <50                                                    | 544                                                                    | 442 <sup>***</sup>                                     |
| Magnesium silicide_Si44μ_650 °C_2 h   | <50                                                    | 248                                                                    | 1800 <sup>****</sup>                                   |

<sup>\*</sup> Rietveld refinement; <sup>\*\*</sup> 7% silicon, 93 % Mg<sub>2</sub>Si; <sup>\*\*\*</sup> 7% silicon, 93 % Mg<sub>2</sub>Si; <sup>\*\*\*\*</sup> 1% silicon, 99 % Mg<sub>2</sub>Si

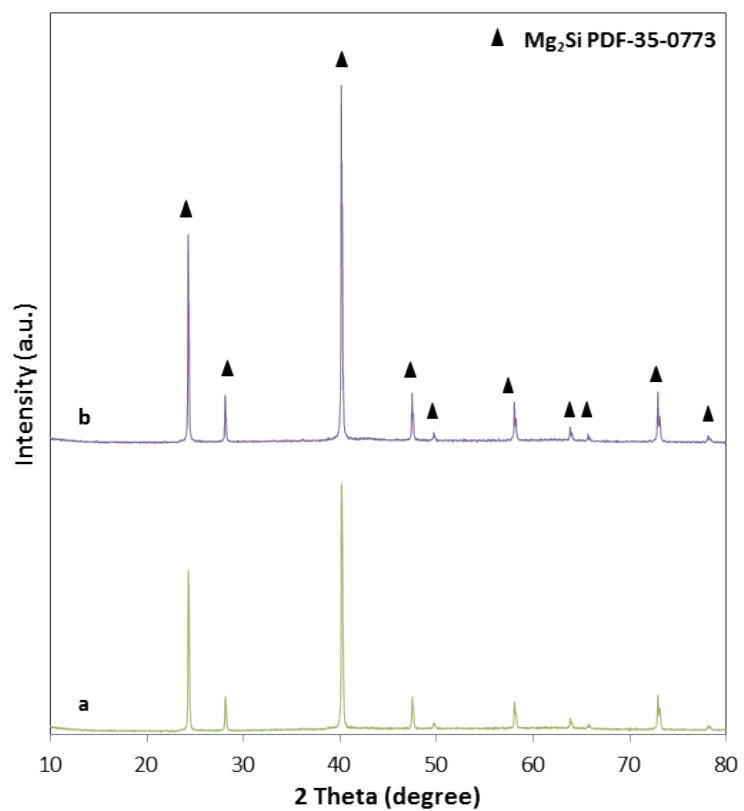

Fig. ESI 1: XRD pattern of  $\text{Mg}_2\text{Si}$  samples with different reaction holding time (a) 650 °C - 2h; (b) 650 °C - 5h

The original silica monolith exhibits a type IV isotherm with H1-type hysteresis loop supporting the mesoporous character of the sample with a monomodal pore size distribution (Fig. ESI 2). Upon removal of MgO after HCl treatment, mixed isotherms of type II and IV with a H1 hysteresis loop (Fig. ESI 2) in the mesoporous region are obtained, indicating the presence of meso- and macroporous silicon. Washing with HF leads to a type II isotherm with a H1 hysteresis loop (Fig. ESI 2). For monolithic porous Mg<sub>2</sub>Si, the N<sub>2</sub> isotherm shows a low amount of adsorbed nitrogen with no distinct hysteresis anymore. Therefore, pore size distributions will not give any reliable results.

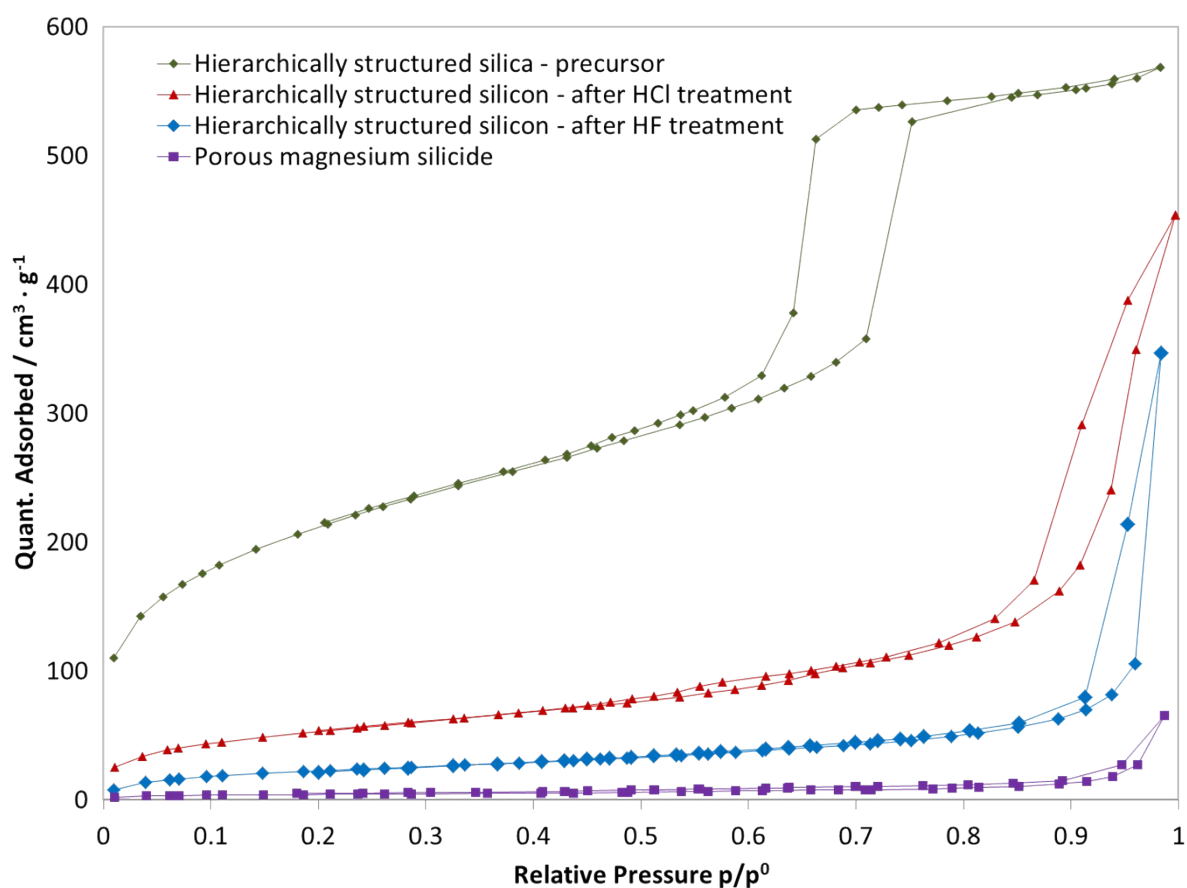

Fig. ESI 2- N<sub>2</sub> sorption isotherms of precursor, intermediate and final products
